# Supplementary material for: Analysis and experimental validation of fatty acid metabolism-related genes prostacyclin synthase (PTGIS) in endometrial cancer
Source: publisher site journal article supplement (doi:10.18632/aging.205080), 2023-10-04
Supplement: Supplementary file [file aging-v15i19-205080-supplementary-material-SD1.pdf]

## SUPPLEMENTARY TABLES

Supplementary Table 1. Primer sequence.

| Gene name | Primer sequence                                                |
|-----------|----------------------------------------------------------------|
| PTGIS     | Forward: AAAGTCGCCTGTGGAAGCTG<br>Reverse: TGCCTGCATCTCCTCTGACA |
| GAPDH     | Forward: CAGGAGGCATTGCTGATGAT<br>Reverse: GAAGGCTGGGGCTCATT    |

Supplementary Table 2. Sequence of siRNA.

| Name           | Sequence                                                                         |
|----------------|----------------------------------------------------------------------------------|
| PTGIS-Homo-544 | Sense (5'-3'): GCCGGCUACCUGACUCUUUTT<br>Antisense (5'-3'): AAAGAGUCAGGUAGCCGGCTT |
